# Supplementary material
Source: PubMed Central journal article supplement (PMC9232953)
Supplement: NIHMS1788552-supplement-1.pdf [file NIHMS1788552-supplement-1.pdf]

## **APPENDIX 1. ASSESSMENT OF LIFESTYLE FACTORS**

At baseline and every 2 years, participants returned a mailed validated questionnaire that obtained updated information on age, body weight, smoking status, physical activity, aspirin and other medications use, multivitamin use, menopausal status and postmenopausal hormone use in women, and physician diagnosis of chronic diseases. Baseline histories of hypertension, hypercholesterolemia, and type 2 diabetes mellitus were determined through self-reporting. Self-reported smoking status and the number of cigarettes smoked were updated biennially. BMI was calculated as weight in kilograms divided by the square of the height in meters. These self-reported measures have demonstrated validity in these cohorts: among a sample of 123 men in the Health Professional's Follow-up Study (HPFS) and 140 women in the Nurses' Health Study (NHS), Pearson correlations coefficients between self-reported weight and technician-measured weight were 0.97.<sup>1</sup>

Participants reported in the questionnaire the average time spent per week in the previous year on specific leisure-time physical activities, including brisk walking, jogging, running, lap swimming, tennis/squash/racquetball, rowing, etc., by choosing 1 of the 10 different duration options, ranging from 0 to  $\geq 11$  h/wk. The validity and the reproducibility of these measurements have been previously reported.<sup>2,3</sup>

Diet and alcohol information was assessed every 4 years using a validated food frequency questionnaire asking the frequency, on average, a participant had consumed a particular amount of a specific type of food during the previous year.<sup>4</sup> The intake of nutrients was computed by multiplying the frequency of consumption of each unit of food by its nutrient content. Quality of diet was assessed using the Alternate Healthy Eating Index (AHEI) score. The AHEI score is based on 11 foods and nutrients predictive of chronic disease risk, emphasizing higher intake of vegetables (excluding potatoes), fruits, whole grains, nuts and legumes, long chain (n-3) fats, and polyunsaturated fatty acids; moderate intake of alcohol; and lower intake of sugar sweetened drinks and fruit juice, red and processed meats, trans fat, and sodium. Each component was scored from 0 (unhealthiest) to 10 (healthiest) points, with intermediate values scored proportionally. All component scores were summed to obtain a total score ranging from 0 (non-adherence) to 110 (best adherence) points.

The food frequency questionnaire also collected alcoholic beverage consumption, including red and white wine separately, beer, and liquor. The amount of alcohol in grams per specified portion size was multiplied by servings per day, the midpoint of the frequency category was determined, and this was summed across all beverages to estimate the average alcohol consumption (g/day).

Information on habitual sleep duration was collected several times during the follow-up questionnaires in both NHS (1986, 2000, 2002, 2008, and 2012) and HPFS (1987, 2000, 2008, and 2012). Participants reported their average sleep duration over a 24-h period with the following categories: 5 or less, 6, 7, 8, 9, 10, or more than 11 hours. To aid recall, participants simultaneously reported their employment status, work schedules, and frequency of rotating night shifts in each period. In a subset of 54,021 women participating in The Nurses' Health Study 2 who also reported their current sleep duration in 2001, the reliability of recalled sleep duration was evaluated in 2009 by comparison with prospectively assessed sleep duration in

**Appendix**  
**Healthy Lifestyle Score Including Sleep Duration and Cardiovascular Disease Risk**  
**Guasch-Ferré et al.**

2001. For each participant, sleep duration reported in 2001 was compared with sleep duration recalled in 2009 for a specific age period corresponding to her age in 2001. The intraclass correlation coefficient between the 2 measurements was 0.52 (95% CI 0.51, 0.53), suggesting moderate reproducibility of recalled sleep duration.<sup>5</sup> Self-reported sleep duration has a correlation of 0.79 ( $p < 0.001$ ) with sleep duration recorded in sleep diaries in a previous validation study.<sup>6</sup>

## REFERENCES

1. Rimm EB, Stampfer MJ, Colditz GA, Chute CG, Litin LB, Willett WC. Validity of self-reported waist and hip circumferences in men and women. *Epidemiology*. 1990;1(6):466–473. <https://doi.org/10.1097/00001648-199011000-00009>.
2. Wolf AM, Hunter DJ, Colditz GA, et al. Reproducibility and validity of a self-administered physical activity questionnaire. *Int J Epidemiol*. 1994;23(5):991–999. <https://doi.org/10.1093/ije/23.5.991>.
3. Chomistek AK, Chiuve SE, Jensen MK, Cook NR, Rimm EB. Vigorous physical activity, mediating biomarkers, and risk of myocardial infarction. *Med Sci Sports Exerc*. 2011;43(10):1884–1890. <https://doi.org/10.1249/MSS.0b013e31821b4d0a>.
4. Yuan C, Spiegelman D, Rimm EB, et al. Relative validity of nutrient intakes assessed by questionnaire, 24-hour recalls, and diet records as compared with urinary recovery and plasma concentration biomarkers: findings for women. *Am J Epidemiol*. 2018;187(5):1051–1063. <https://doi.org/10.1093/aje/kwx328>.
5. Baden MY, Hu FB, Vetter C, Schernhammer E, Redline S, Huang T. Sleep duration patterns in early to middle adulthood and subsequent risk of type 2 diabetes in women. *Diabetes Care*. 2020;43(6):1219–1226. <https://doi.org/10.2337/dc19-2371>.
6. Patel SR, Ayas NT, Malhotra MR, et al. A prospective study of sleep duration and mortality risk in women. *Sleep*. 2004;27(3):440–444. <https://doi.org/10.1093/sleep/27.3.440>.

**Appendix**  
**Healthy Lifestyle Score Including Sleep Duration and Cardiovascular Disease Risk**  
**Guasch-Ferré et al.**

**Appendix Table 1.** Healthy Lifestyle Score Including Sleep Duration

| <b>Health factor</b>                                                                   | <b>Definition of low-risk</b>                                               |
|----------------------------------------------------------------------------------------|-----------------------------------------------------------------------------|
| Smoking                                                                                | Not currently smoking                                                       |
| Physical activity                                                                      | ≥3.5 hours/week or 30 minutes/day of moderate to vigorous physical activity |
| Alternative Healthy Eating Index -2010                                                 | Top 40% of the diet quality score Alternative Healthy Eating Index-2010     |
| BMI                                                                                    | 18.5–24.9 kg/m <sup>2</sup>                                                 |
| Alcohol intake                                                                         | 5–14.9 g/day for women and 5–30 g/day for men                               |
| Sleep duration                                                                         | ≥6 to <8 hours/day                                                          |
| Traditional lifestyle score                                                            | 5 points                                                                    |
| Traditional lifestyle score + sleep (healthy lifestyle score including sleep duration) | 6 points                                                                    |

**Appendix**  
**Healthy Lifestyle Score Including Sleep Duration and Cardiovascular Disease Risk**  
**Guasch-Ferré et al.**

**Appendix Table 2.** Baseline Characteristics According to Sleep Duration Categories

| Variable                                    | Sleep duration hours/day |                    |                    |              |
|---------------------------------------------|--------------------------|--------------------|--------------------|--------------|
|                                             | <6 hours/day             | ≥6 to <8 hours/day | ≥8 to <9 hours/day | ≥9 hours/day |
| <b>Nurses' Health Study</b>                 |                          |                    |                    |              |
| n (%)                                       | 20,151 (29.9)            | 43,929 (65.3)      | 2,734 (4.1)        | 436 (0.7)    |
| Age, years                                  | 46.4 (7)                 | 46.3 (7.2)         | 46.9 (7.4)         | 47.5 (7)     |
| BMI, kg/m <sup>2</sup>                      | 25.9 (5.1)               | 25.2 (4.5)         | 25.7 (5)           | 26.5 (5.5)   |
| AHEI                                        | 46.8 (10.6)              | 47 (10.6)          | 46.1 (10.7)        | 44.4 (10.9)  |
| Physical activity, hours/week               | 1.9 (3.5)                | 1.9 (3.3)          | 1.6 (2.8)          | 1.2 (2.7)    |
| Alcohol intake, g/day                       | 5.5 (10.1)               | 6.3 (10.7)         | 7.6 (13.2)         | 9 (16.8)     |
| White, %                                    | 96.5                     | 98.4               | 98.8               | 98.6         |
| Multivitamin use, %                         | 42.2                     | 42.7               | 44.4               | 36.6         |
| Aspirin use, %                              | 66.4                     | 68.4               | 66.1               | 66.6         |
| Baseline high blood pressure, %             | 17.5                     | 15.4               | 18.9               | 22.8         |
| Baseline high blood cholesterol, %          | 13.4                     | 12.8               | 14.5               | 14.9         |
| Baseline diabetes, %                        | 4.3                      | 3.6                | 5.7                | 7.4          |
| Family history of diabetes, %               | 31.3                     | 29.4               | 30.9               | 33.6         |
| Family history of cancer, %                 | 14.4                     | 15.0               | 14.9               | 15.6         |
| Family history of myocardial infarction, %  | 26.8                     | 25.2               | 25.4               | 29.7         |
| Smoking, current%                           | 22.8                     | 19.6               | 20.7               | 24.6         |
| Sleep, hours/day                            | 4.9 (0.2)                | 6.4 (0.5)          | 8 (0)              | 9.1 (0.3)    |
| <b>Health Professionals Follow-up Study</b> |                          |                    |                    |              |
| n (%)                                       | 609 (2.1)                | 19,569 (67.2)      | 7,488 (25.7)       | 1,448 (5)    |
| Age, years                                  | 57 (10.3)                | 54.1 (9.4)         | 56.3 (9.9)         | 60.8 (10)    |
| BMI, kg/m <sup>2</sup>                      | 25.9 (3.5)               | 25.2 (3)           | 25.3 (3)           | 25.6 (3.2)   |
| AHEI                                        | 47.3 (10.8)              | 47.5 (11)          | 46.4 (10.8)        | 45.8 (11.1)  |
| Physical activity, hours/week               | 3 (4.6)                  | 2.9 (4.2)          | 2.7 (4.2)          | 2.3 (3.7)    |
| Alcohol intake, g/day                       | 10.6 (17)                | 10.9 (14.6)        | 12.8 (16.6)        | 15.9 (19.8)  |
| White, %                                    | 90.9                     | 94.4               | 95.7               | 95.5         |
| Multivitamin use, %                         | 64.0                     | 62.7               | 60.5               | 59.3         |
| Aspirin use, %                              | 29.4                     | 30.2               | 30.2               | 31.9         |
| Baseline high blood pressure, %             | 31.0                     | 24.2               | 25.6               | 32.2         |
| Baseline high blood cholesterol, %          | 16.7                     | 12.8               | 11.9               | 14.9         |
| Baseline diabetes, %                        | 4.4                      | 2.6                | 3.1                | 4.3          |
| Family history of myocardial infarction, %  | 31.8                     | 34.1               | 33.1               | 32.5         |
| Family history of cancer, %                 | 39.7                     | 36.9               | 36.7               | 39.4         |
| Family history of diabetes, %               | 28.9                     | 24.5               | 24.3               | 23.5         |
| Smoking, current%                           | 31.8                     | 34.1               | 33.1               | 32.5         |
| Sleep, hours/day                            | 5 (0)                    | 6.7 (0.5)          | 8 (0)              | 9.1 (0.4)    |

*Notes:* Values are means (SD) for continuous variables; percentages for categorical variables, and are standardized to the age distribution of the study population.

AHEI, Alternative Healthy Eating Index-2010.

**Appendix**  
**Healthy Lifestyle Score Including Sleep Duration and Cardiovascular Disease Risk**  
**Guasch-Ferré et al.**

**Appendix Table 3.** Hazard Ratios (95% CI) of CVD, CHD, and Stroke Incidence According to Individual Lifestyle Factors, Data From Both Cohorts Combined

| Variable                      | CVD                    |                   | CHD                    |                   | Stroke                 |                   |
|-------------------------------|------------------------|-------------------|------------------------|-------------------|------------------------|-------------------|
|                               | Cases/<br>Person-Years | HR (95% CI)       | Cases/<br>Person-Years | HR (95% CI)       | Cases/<br>Person-Years | HR (95% CI)       |
| Cigarette smoking             |                        |                   |                        |                   |                        |                   |
| Never                         | 4,353/1,247,921        | 1.00 (ref)        | 2,721/1,249,857        | 1.00 (ref)        | 1,689/1,249,933        | 1.00 (ref)        |
| Past                          | 6,214/1,257,188        | 1.27 (1.22, 1.32) | 4,139/1,259,383        | 1.33 (1.27, 1.40) | 2,137/1,259,928        | 1.16 (1.09, 1.24) |
| Current 1–14/day              | 508/111,259            | 1.61 (1.47, 1.77) | 324/111,423            | 1.64 (1.46, 1.84) | 206/111,418            | 1.64 (1.42, 1.90) |
| Current ≥15/day               | 635/137,670            | 2.23 (2.05, 2.42) | 425/137,806            | 2.25 (2.03, 2.50) | 231/137,846            | 2.05 (1.78, 2.35) |
| Alcohol consumption, g/day    |                        |                   |                        |                   |                        |                   |
| 0                             | 5,538/1,073,380        | 1.43 (1.35, 1.51) | 3,509/1,075,624        | 1.53 (1.44, 1.64) | 2,114/1,075,734        | 1.28 (1.17, 1.40) |
| 1–4.9                         | 2,561/725,943          | 1.17 (1.11, 1.25) | 1,761/726,757          | 1.26 (1.18, 1.36) | 847/727,151            | 1.01 (0.91, 1.11) |
| 5–14.9                        | 1,930/542,898          | 1.00 (ref)        | 1,273/543,594          | 1.00 (ref)        | 684/543,765            | 1.00 (ref)        |
| 15–29.9                       | 905/248,296            | 0.90 (0.83, 0.98) | 562/248,696            | 0.84 (0.76, 0.93) | 343/248,706            | 1.00 (0.88, 1.14) |
| ≥30                           | 776/163,522            | 1.09 (1.00, 1.18) | 504/163,798            | 1.03 (0.93, 1.14) | 275/163,770            | 1.20 (1.05, 1.39) |
| Physical activity, hours/week |                        |                   |                        |                   |                        |                   |
| 0                             | 6,024/1,053,113        | 1.00 (ref)        | 3,785/1,055,335        | 1.00 (ref)        | 2,296/1,055,373        | 1.00 (ref)        |
| 0.1–0.9                       | 1,544/371,872          | 0.89 (0.84, 0.94) | 1,019/372,437          | 0.89 (0.83, 0.96) | 564/372,539            | 0.89 (0.81, 0.97) |
| 1.0–2.5                       | 1,518/410,799          | 0.80 (0.75, 0.84) | 1,023/411,437          | 0.79 (0.74, 0.85) | 524/411,633            | 0.79 (0.72, 0.87) |
| 2.6–5                         | 1,168/405,655          | 0.63 (0.59, 0.67) | 783/406,126            | 0.62 (0.58, 0.67) | 406/406,247            | 0.64 (0.58, 0.72) |
| >5                            | 1,456/512,600          | 0.56 (0.53, 0.59) | 999/513,134            | 0.55 (0.51, 0.59) | 473/513,333            | 0.58 (0.52, 0.64) |
| BMI, kg/m <sup>2</sup>        |                        |                   |                        |                   |                        |                   |
| 18.5–22.9                     | 2,761/719,061          | 1.04 (0.98, 1.10) | 1,600/720,383          | 1.00 (0.92, 1.07) | 1,175/720,298          | 1.09 (0.99, 1.19) |
| 22.9–24.9                     | 1,982/538,150          | 1.00 (ref)        | 1,294/538,913          | 1.00 (ref)        | 724/539,071            | 1.00 (ref)        |
| 25–29.9                       | 3,840/934,998          | 1.16 (1.10, 1.23) | 2,489/936,418          | 1.16 (1.08, 1.24) | 1,411/936,886          | 1.16 (1.06, 1.27) |
| 30.0–34.9                     | 1,363/335,477          | 1.36 (1.27, 1.46) | 873/336,046            | 1.40 (1.28, 1.53) | 521/336,066            | 1.30 (1.16, 1.45) |
| ≥35                           | 641/145,909            | 1.72 (1.57, 1.88) | 436/146,102            | 1.93 (1.72, 2.15) | 226/146,181            | 1.45 (1.25, 1.69) |
| AHEI                          |                        |                   |                        |                   |                        |                   |
| Quintile 1                    | 2,714/542,484          | 1 (ref)           | 1,717/543,379          | 1.00 (ref)        | 996/543,500            | 1.00 (ref)        |
| Quintile 2                    | 2,464/548,294          | 0.91 (0.86, 0.96) | 1,561/549,240          | 0.89 (0.83, 0.96) | 930/549,268            | 0.95 (0.87, 1.04) |
| Quintile 3                    | 2,429/551,612          | 0.91 (0.86, 0.96) | 1,600/552,554          | 0.91 (0.85, 0.98) | 883/552,710            | 0.92 (0.84, 1.01) |
| Quintile 4                    | 2,133/554,660          | 0.80 (0.75, 0.85) | 1,415/555,493          | 0.79 (0.74, 0.85) | 754/555,634            | 0.81 (0.73, 0.89) |
| Quintile 5                    | 1,970/556,989          | 0.75 (0.70, 0.79) | 1,316/557,804          | 0.74 (0.69, 0.79) | 700/558,013            | 0.77 (0.69, 0.84) |
| Sleep duration, hours/day     |                        |                   |                        |                   |                        |                   |
| <6                            | 1,310/338,151          | 1.29 (1.22, 1.38) | 837/338,595            | 1.33 (1.23, 1.43) | 511/338,707            | 1.23 (1.12, 1.36) |
| ≥6 to <8                      | 6,045/1,593,168        | 1.00 (ref)        | 4,076/1,614,632        | 1.00 (ref)        | 2,125/1,615,256        | 1.00 (ref)        |
| ≥8 to <9                      | 2,826/598,359          | 0.96 (0.92, 1.00) | 1,846/599,407          | 0.93 (0.88, 0.99) | 1,008/599,606          | 1.02 (0.95, 1.11) |
| ≥9                            | 1,529/224,361          | 1.13 (1.07, 1.20) | 913/225,177            | 1.02 (0.95, 1.10) | 628/224,959            | 1.36 (1.25, 1.49) |

**Appendix**  
**Healthy Lifestyle Score Including Sleep Duration and Cardiovascular Disease Risk**  
**Guasch-Ferré et al.**

*Notes:* Multivariable-adjusted HR was adjusted for age; ethnicity; current multivitamin use; current aspirin use; family history of diabetes mellitus, myocardial infarction, or cancer; and menopausal status and hormone use (women only). Results for Nurses' Health Study and Health Professionals Follow-up Study pooled and stratified by cohort.

AHEI, Alternative Healthy Eating Index; CHD, coronary heart disease; CVD, cardiovascular disease; HR, hazard ratio.

**Appendix**  
**Healthy Lifestyle Score Including Sleep Duration and Cardiovascular Disease Risk**  
**Guasch-Ferré et al.**

**Appendix Table 4.** Area Under the Curve (AUC), Net Reclassification Improvement (NRI) and Integrated Discrimination Improvement (IDI) of the Risk Prediction Models for CVD

| Variable                               | Traditional lifestyle score <sup>a</sup> | Traditional lifestyle score and sleep duration <sup>b</sup> |                 |
|----------------------------------------|------------------------------------------|-------------------------------------------------------------|-----------------|
|                                        | Values (95% CI)                          | Values (95% CI)                                             | <i>p</i> -value |
| AUC                                    | 0.64 (0.63, 0.64)                        | 0.65 (0.64, 0.65)                                           | <0.0001         |
| NRI                                    |                                          |                                                             |                 |
| Category-free NRI (%)                  | ref                                      | 15 (13.3, 16.8)                                             | <0.0001         |
| % of events correctly reclassified     | –                                        | 26                                                          |                 |
| % of non-events correctly reclassified | –                                        | 41                                                          |                 |
| IDI                                    | ref                                      | 0.00017 (0.0001, 0.0002)                                    | <0.0001         |

*Notes:* Low-risk factors in the score included cigarette smoking (not smoking), physically active ( $\geq 3.5$  hours/week of moderate to vigorous intensity activity), high diet quality (top 40% of Alternate Healthy Eating Index), moderate alcohol intake of 5 to 14.9 g/day (women) or 5 to 30 g/day (men), normal weight (BMI, 18.5–24.9 kg/m<sup>2</sup>), and sleep duration ( $\geq 6$  to  $< 8$  hours/day). Traditional lifestyle score included all factors except sleep duration. Results for Nurses' Health Study and Health Professionals Follow-up Study pooled and stratified by cohort.

<sup>a</sup>Traditional lifestyle score included age, and the traditional lifestyle score.

<sup>b</sup>Traditional lifestyle score and sleep duration included age, the traditional lifestyle score, and sleep duration.

**Appendix**  
**Healthy Lifestyle Score Including Sleep Duration and Cardiovascular Disease Risk**  
**Guasch-Ferré et al.**

**Appendix Table 5.** Hazard Ratios (95% CI) of CVD Incidence Stratified by Age and History of Diseases

| <b>Number of low-risk factors<sup>a</sup></b> | <b>Age &lt;65 years</b>                   | <b>Age ≥65 years</b>                   |
|-----------------------------------------------|-------------------------------------------|----------------------------------------|
| None                                          | 1.00 (ref)                                | 1.00 (ref)                             |
| 1                                             | 0.60 (0.47, 0.75)                         | 0.83 (0.65, 1.07)                      |
| 2                                             | 0.45 (0.36, 0.56)                         | 0.71 (0.55, 0.91)                      |
| 3                                             | 0.38 (0.30, 0.47)                         | 0.61 (0.48, 0.79)                      |
| ≥4                                            | 0.27 (0.22, 0.34)                         | 0.47 (0.37, 0.61)                      |
|                                               | <b>No history of diabetes</b>             | <b>History of diabetes</b>             |
| None                                          | 1.00 (ref)                                | 1.00 (ref)                             |
| 1                                             | 0.71 (0.59, 0.84)                         | 0.50 (0.31, 0.78)                      |
| 2                                             | 0.58 (0.48, 0.69)                         | 0.45 (0.29, 0.71)                      |
| 3                                             | 0.50 (0.42, 0.60)                         | 0.40 (0.25, 0.62)                      |
| ≥4                                            | 0.39 (0.32, 0.46)                         | 0.32 (0.20, 0.50)                      |
|                                               | <b>No history of hypertension</b>         | <b>History of hypertension</b>         |
| None                                          | 1.00 (ref)                                | 1.00 (ref)                             |
| 1                                             | 0.70 (0.52, 0.94)                         | 0.66 (0.54, 0.81)                      |
| 2                                             | 0.54 (0.40, 0.72)                         | 0.56 (0.46, 0.69)                      |
| 3                                             | 0.43 (0.33, 0.58)                         | 0.52 (0.42, 0.63)                      |
| ≥4                                            | 0.34 (0.26, 0.46)                         | 0.41 (0.33, 0.50)                      |
|                                               | <b>No history of hypercholesterolemia</b> | <b>History of hypercholesterolemia</b> |
| None                                          | 1.00 (ref)                                | 1.00 (ref)                             |
| 1                                             | 0.66 (0.50, 0.86)                         | 0.69 (0.56, 0.85)                      |
| 2                                             | 0.51 (0.40, 0.66)                         | 0.58 (0.47, 0.72)                      |
| 3                                             | 0.46 (0.35, 0.59)                         | 0.49 (0.40, 0.61)                      |
| ≥4                                            | 0.33 (0.26, 0.44)                         | 0.38 (0.31, 0.47)                      |

*Notes:* P for interaction were all >0.05. Results for Nurses' Health Study and Health Professionals Follow-up Study pooled and stratified by cohort. Multivariable-adjusted HR adjusted for age (except for the stratified analysis by age); ethnicity; current multivitamin use; current aspirin use; family history of diabetes mellitus, myocardial infarction, or cancer; and menopausal status and hormone use (women only).

<sup>a</sup>Low-risk factors in the score included cigarette smoking (not smoking), physically active (≥3.5 hours/week of moderate to vigorous intensity activity), high diet quality (top 40% of Alternate Healthy Eating Index), moderate alcohol intake of 5 to 14.9 g/day (women) or 5 to 30 g/day (men), normal weight (BMI, 18.5–24.9 kg/m<sup>2</sup>), and sleep duration (≥6 to <8 hours/day). Traditional lifestyle score included all factors except sleep duration. (Score ranging from 0 to 6).

CVD, cardiovascular disease; HR, hazard ratio.



**Appendix**  
**Healthy Lifestyle Score Including Sleep Duration and Cardiovascular Disease Risk**  
**Guasch-Ferré et al.**

**Appendix Table 6.** Hazard Ratios (95% CI) of Total CVD Incidence by Combined Lifestyle Factors Excluding 1 Component at a Time

| <b>Number of low-risk factors<sup>a</sup></b> | <b>None</b>   | <b>1</b>             | <b>2</b>             | <b>3</b>             | <b>4</b>             | <b>5</b>             |
|-----------------------------------------------|---------------|----------------------|----------------------|----------------------|----------------------|----------------------|
| Excluding alcohol                             | 1.00<br>(ref) | 0.63 (0.54,<br>0.73) | 0.55 (0.47,<br>0.63) | 0.49 (0.42,<br>0.56) | 0.43 (0.37,<br>0.50) | 0.26 (0.21,<br>0.32) |
| Excluding smoking                             | 1.00<br>(ref) | 0.88 (0.83,<br>0.93) | 0.75 (0.71,<br>0.80) | 0.62 (0.58,<br>0.66) | 0.52 (0.47,<br>0.57) | 0.27 (0.21,<br>0.35) |
| Excluding BMI                                 | 1.00<br>(ref) | 0.69 (0.61,<br>0.78) | 0.58 (0.52,<br>0.65) | 0.49 (0.44,<br>0.55) | 0.40 (0.35,<br>0.46) | 0.31 (0.26,<br>0.38) |
| Excluding diet                                | 1.00<br>(ref) | 0.67 (0.58,<br>0.77) | 0.54 (0.46,<br>0.62) | 0.46 (0.39,<br>0.52) | 0.36 (0.30,<br>0.41) | 0.23 (0.19,<br>0.29) |
| Excluding physical activity                   | 1.00<br>(ref) | 0.67 (0.57,<br>0.78) | 0.57 (0.49,<br>0.67) | 0.51 (0.43,<br>0.60) | 0.44 (0.37,<br>0.51) | 0.36 (0.30,<br>0.44) |

*Notes:* Multivariable-adjusted HR adjusted for age (except for the stratified analysis by age); ethnicity; current multivitamin use; current aspirin use; family history of diabetes mellitus, myocardial infarction, or cancer; and menopausal status and hormone use (women only), and the excluded factor.

<sup>a</sup>Low-risk factors in the score included cigarette smoking (not smoking), physically active ( $\geq 3.5$  hours/week of moderate to vigorous intensity activity), high diet quality (top 40% of Alternate Healthy Eating Index), moderate alcohol intake of 5 to 14.9 g/day (women) or 5 to 30 g/day (men), normal weight (BMI, 18.5–24.9 kg/m<sup>2</sup>), and sleep duration ( $\geq 6$  to  $< 8$  hours/day). Traditional lifestyle score included all factors except sleep duration. (Score ranging from 0 to 6). Results using NHS and HPFS pooled. Lifestyle score excluding sleep is the traditional lifestyle score presented in Table 2. Results for Nurses' Health Study and Health Professionals Follow-up Study pooled and stratified by cohort.

CVD, cardiovascular disease; HR, hazard ratio; NHS, Nurses' Health Study; HPFS, Health Professional's Follow-up Study.

**Appendix**  
**Healthy Lifestyle Score Including Sleep Duration and Cardiovascular Disease Risk**  
**Guasch-Ferré et al.**

**Appendix Table 7.** Hazard Ratios (95% CI) of CVD, CHD, and Stroke Incidence According to the Healthy Lifestyle Score Using 7–9 Hours/Day as Optimal Sleep, Data From Both Cohorts Combined

| Healthy Lifestyle Score including sleep duration <sup>a</sup> | CVD                    |                          | CHD                    |                   | Stroke                 |                   |
|---------------------------------------------------------------|------------------------|--------------------------|------------------------|-------------------|------------------------|-------------------|
|                                                               | Cases/<br>Person-years | HR <sup>b</sup> (95% CI) | Cases/<br>Person-years | HR (95% CI)       | Cases/<br>Person-years | HR (95% CI)       |
| None                                                          | 162/32,847             | 1.00 (ref)               | 104/32,869             | 1.00 (ref)        | 65/32,873              | 1.00 (ref)        |
| 1                                                             | 1,703/334,774          | 0.64 (0.54, 0.75)        | 1,151/335,247          | 0.70 (0.57, 0.85) | 611/335,313            | 0.55 (0.43, 0.72) |
| 2                                                             | 3,726/774,804          | 0.52 (0.44, 0.61)        | 2,426/776,026          | 0.55 (0.45, 0.67) | 1,342/776,283          | 0.49 (0.38, 0.63) |
| 3                                                             | 3,606/831,549          | 0.43 (0.37, 0.51)        | 2,304/833,101          | 0.44 (0.36, 0.54) | 1,330/833,230          | 0.42 (0.33, 0.54) |
| 4                                                             | 1,847/527,549          | 0.34 (0.29, 0.40)        | 1,190/528,339          | 0.34 (0.28, 0.42) | 673/528,462            | 0.34 (0.26, 0.44) |
| 5                                                             | 585/211,040            | 0.27 (0.23, 0.33)        | 387/211,270            | 0.28 (0.22, 0.34) | 208/211,359            | 0.29 (0.22, 0.38) |
| 6                                                             | 81/41,476              | 0.19 (0.14, 0.25)        | 47/41,516              | 0.16 (0.11, 0.22) | 34/41,505              | 0.25 (0.17, 0.38) |

<sup>a</sup>Low-risk factors in the score included cigarette smoking (not smoking), physically active ( $\geq 3.5$  hours/week of moderate to vigorous intensity activity), high diet quality (top 40% of Alternate Healthy Eating Index), moderate alcohol intake of 5 to 14.9 g/day (women) or 5 to 30 g/day (men), normal weight (BMI, 18.5–24.9 kg/m<sup>2</sup>), and sleep duration ( $\geq 7$  to  $< 7$  hours/day).

<sup>b</sup>Multivariable-adjusted HR was adjusted for age; ethnicity; current multivitamin use; current aspirin use; family history of diabetes mellitus, myocardial infarction, or cancer; and menopausal status and hormone use (women only).

CHD, coronary heart disease; CVD, cardiovascular disease; HR, hazard ratio.

**Appendix**  
**Healthy Lifestyle Score Including Sleep Duration and Cardiovascular Disease Risk**  
**Guasch-Ferré et al.**

**Appendix Table 8.** HR (95% CI) and PAR of CVD by Adhering to All Low-Risk Lifestyle Factors Versus Other Categories

| Lifestyle score and PAR                                       | Total CVD                      |                         | CHD                            |                         | Stroke                         |                         |
|---------------------------------------------------------------|--------------------------------|-------------------------|--------------------------------|-------------------------|--------------------------------|-------------------------|
|                                                               | Cases/Person-years at low-risk | MV-adjusted HR (95% CI) | Cases/Person-years at low-risk | MV-adjusted HR (95% CI) | Cases/Person-years at low-risk | MV-adjusted HR (95% CI) |
| Traditional lifestyle score                                   | 123/64,853                     | 0.44<br>(0.37, 0.52)    | 71/64,924                      | 0.36<br>(0.28, 0.45)    | 53/64,895                      | 0.61<br>(0.46, 0.80)    |
| Healthy lifestyle score including sleep duration <sup>a</sup> | 56/40,524                      | 0.34<br>(0.26, 0.44)    | 37/40,546                      | 0.32<br>(0.23, 0.44)    | 20/40,545                      | 0.39<br>(0.25, 0.61)    |
| PAR% traditional score <sup>b</sup>                           | 54 (45, 62)                    |                         | 60 (49, 69)                    |                         | 40 (23, 55)                    |                         |
| PAR% lifestyle score including sleep duration                 | 66 (56, 75)                    |                         | 67 (54, 77)                    |                         | 62 (42, 76)                    |                         |

<sup>a</sup>Low-risk factors in the score included cigarette smoking (not smoking), physically active ( $\geq 3.5$  hours/week of moderate to vigorous intensity activity), high diet quality (top 40% of Alternate Healthy Eating Index), moderate alcohol intake of 5 to 14.9 g/day (women) or 5 to 30 g/day (men), normal weight (BMI, 18.5–24.9 kg/m<sup>2</sup>), and sleep duration ( $\geq 6$  to  $< 8$  hours/day) (Score ranging from 0 to 6). Traditional lifestyle score included all factors except sleep duration.

<sup>b</sup>HR and PAR for adhering to all low-risk lifestyle factors of the score (5 factors for the Traditional Lifestyle score and 6 factors for the Healthy Lifestyle Score including sleep duration) vs all other categories (not adhering to all the low-risk factors). HR adjusted for age (months), ethnicity, menopausal status [pre or postmenopausal (never, past or current menopausal hormone use)] (only in women), family history of diabetes (yes/no), family history of myocardial infarction (yes/no), family history of cancer (yes/no), current aspirin use (yes/no), current multivitamin use (yes/no). PAR was adjusted for age and time period. Results for Nurses' Health Study and Health Professional's Follow-up Study pooled and stratified by cohort.

PAR, population attributable risk; CVD, cardiovascular disease; CHD, coronary heart disease; MV, multivariable; HR, hazard ratio.
